# Supplementary material
Source: publisher figshare collection journal article supplement (https://acs.figshare.com/ndownloader/files/7785928)
Supplement: Supplementary file 1 [file 7785928]

## Supporting Information

### **Correlating Membrane Morphological Responses with Micellar Aggregation Behavior of Capric Acid and Monocaprin**

Bo Kyeong Yoon<sup>1,2</sup>, Joshua A. Jackman<sup>1,2</sup>, Min Chul Kim<sup>1,2</sup>, Tun Naw Sut<sup>1,2</sup>, Nam-Joon Cho<sup>\*,1,2,3</sup>

<sup>1</sup>School of Materials Science and Engineering, Nanyang Technological University, 50 Nanyang Avenue 639798, Singapore

<sup>2</sup>Centre for Biomimetic Sensor Science, Nanyang Technological University, 50 Nanyang Drive 637553, Singapore

<sup>3</sup>School of Chemical and Biomedical Engineering, Nanyang Technological University, 62 Nanyang Drive 637459, Singapore

\*Corresponding author

E-mail: njcho@ntu.edu.sg

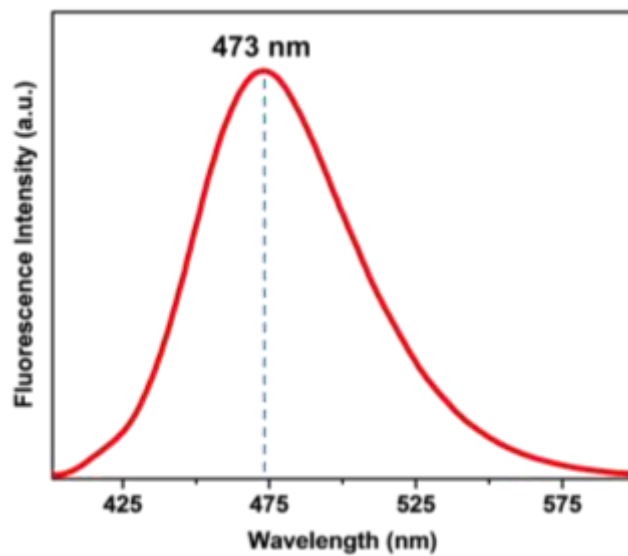

**Figure S1. Fluorescence emission spectrum of 1-pyrenecarboxaldehyde in PBS solution.**  
The excitation wavelength was 365.5 nm.

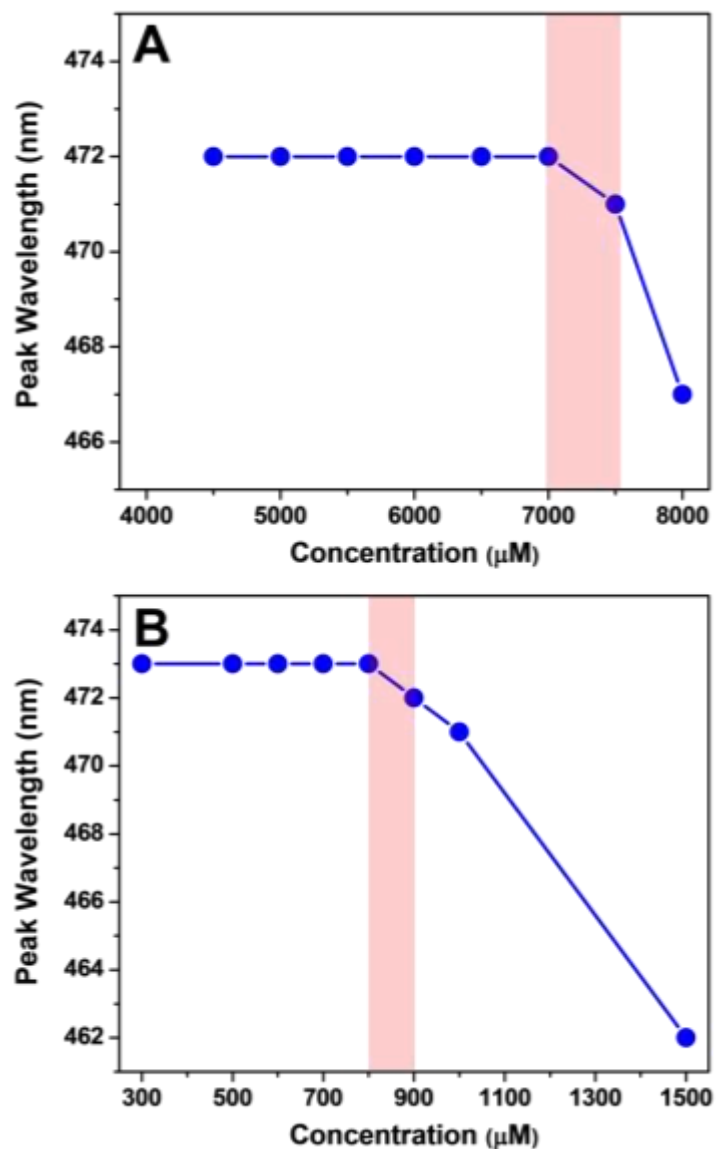

**Figure S2. Determination of SDS critical micelle concentration using the 1-pyrenecarboxaldehyde fluorescence probe.** Peak wavelength is presented as a function of SDS concentration in (A) distilled water and (B) PBS. Each data point is the average of six technical replicates ( $n = 6$ ).

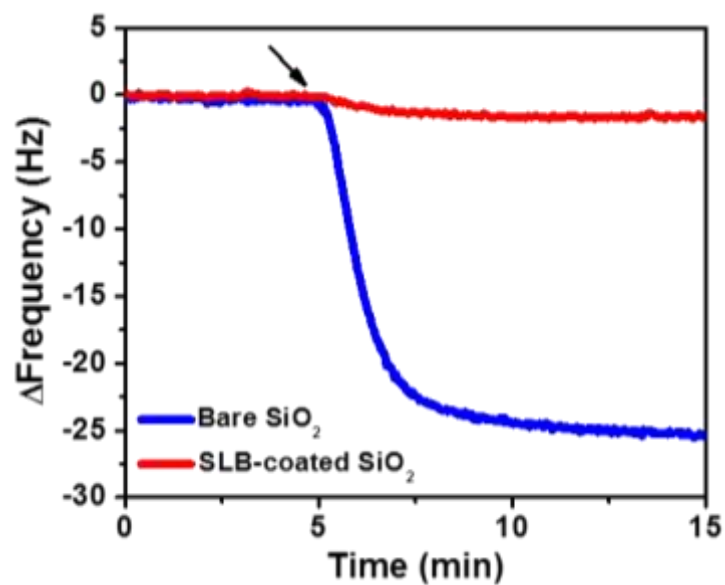

**Figure S3. QCM-D measurement of BSA protein adsorption onto bare and SLB-coated silicon dioxide surfaces.** Changes in the QCM-D frequency signal were monitored as a function of time. The measurement baseline was recorded in PBS solution, and BSA protein was added starting at  $t=5$  min (see arrow).
